# INFOGRAPHICS IN ANESTHESIOLOGY

Complex Information for Anesthesiologists Presented Quickly and Clearly

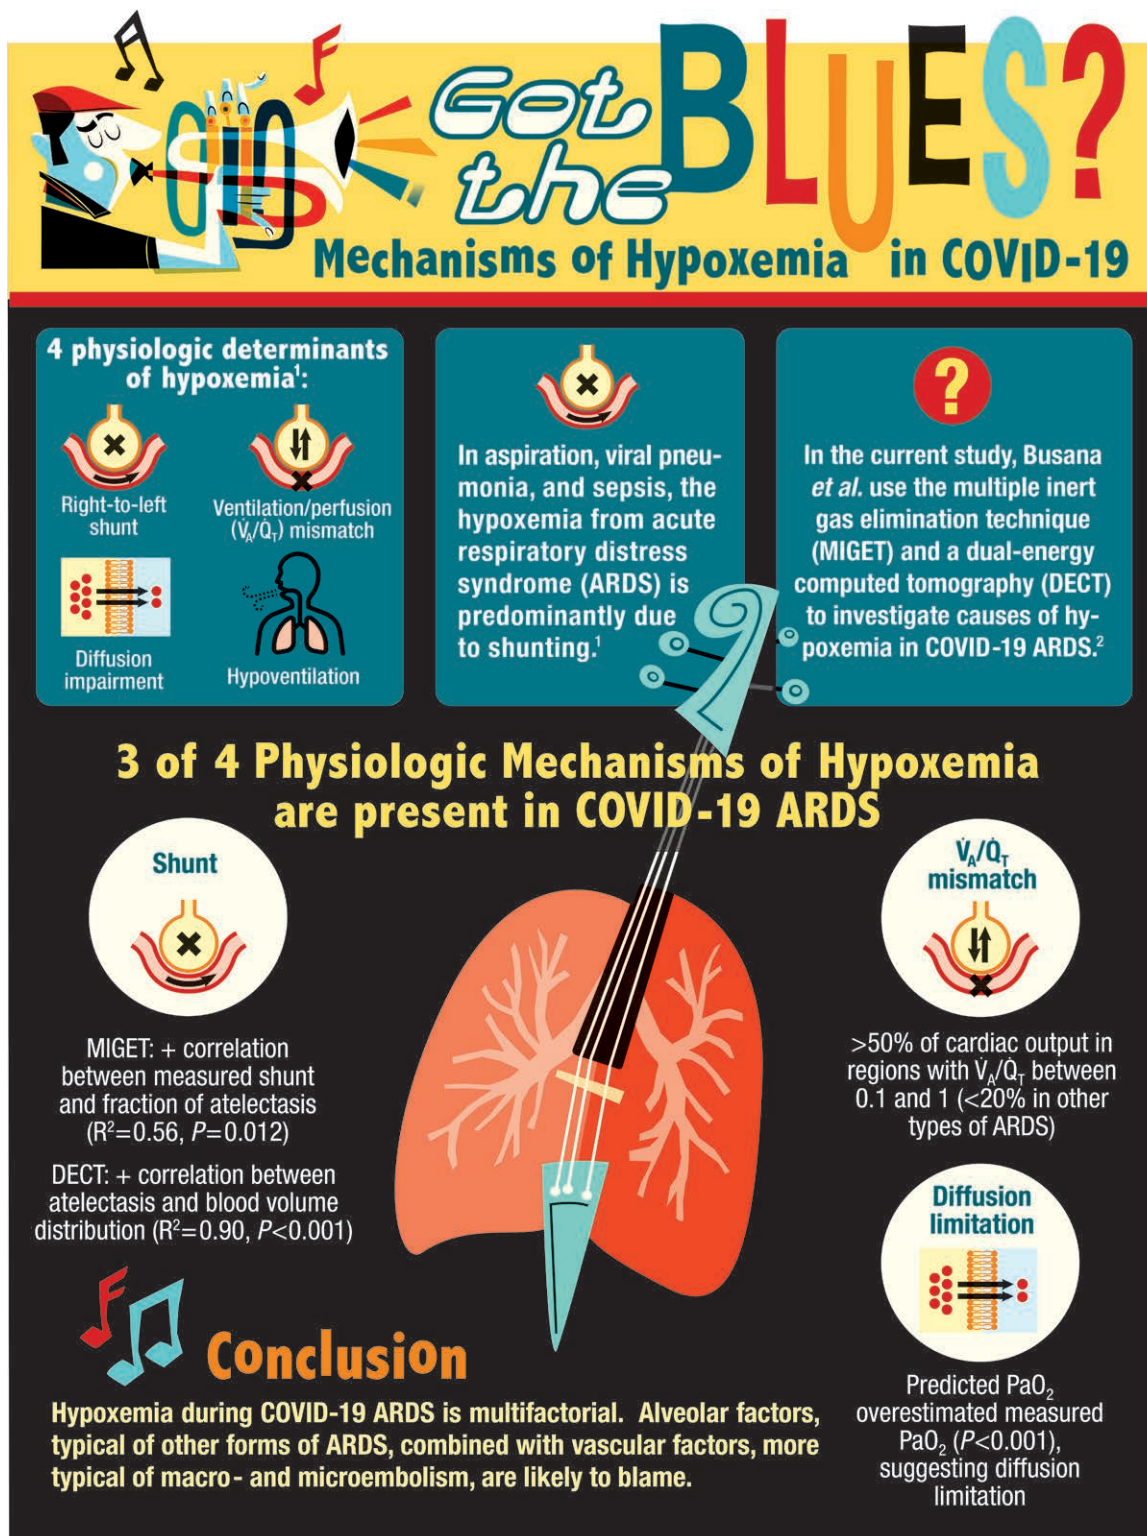

$PaO_2$ , partial pressure of oxygen

Infographic created by Holly B. Ende, Vanderbilt University Medical Center; James P. Rathmell, Brigham and Women's Health Care/Harvard Medical School; and Jonathan P. Wanderer, Vanderbilt University Medical Center. Illustration by Annemarie Johnson, Vivo Visuals Studio. Address correspondence to Dr. Ende: holly.ende@vumc.org.

1. Capaccione KM, Vidal Melo MF: Structure–function relationships determining hypoxemia in COVID-19 acute respiratory distress syndrome. *ANESTHESIOLOGY* 2024; 140:186–8
2. Busana M, Rau A, Lazzari S, Gattarello S, Cressoni M, Biggemann L, Harnisch L-O, Giosa L, Vogt A, Saager L, Lotz J, Meller B, Meissner K, Gattinoni L, Moerer O: Causes of hypoxemia in COVID-19 acute respiratory distress syndrome: A combined multiple inert gas elimination technique and dual-energy computed tomography study. *ANESTHESIOLOGY* 2024; 140:251–60
